# Supplementary material
Source: Springer Nature journal article supplement (https://www.springermedizin.de/resource/supplementary/13075_2009_2752_MOESM3_ESM.pdf/9692802)

Saline day 7

AIA day 7

AIA day 28

Toluidine  
blue

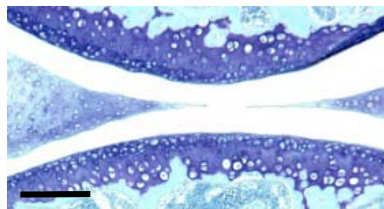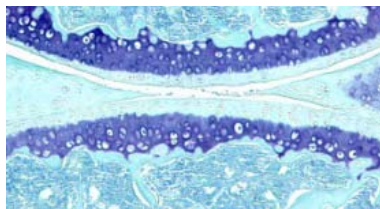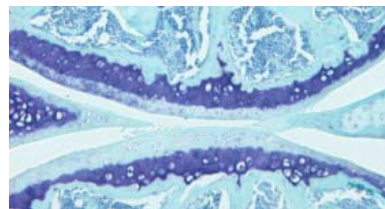

S100A8

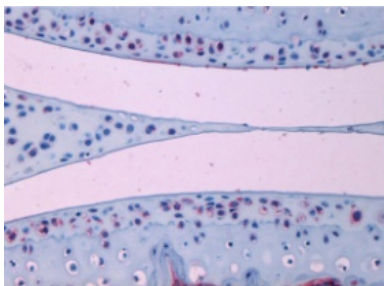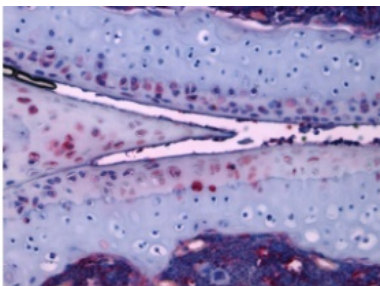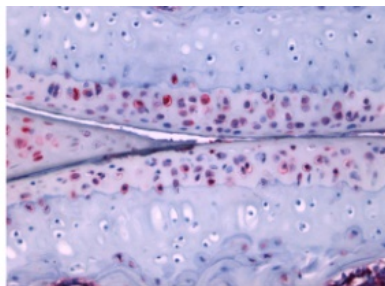

S100A9

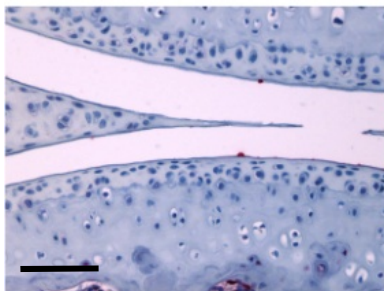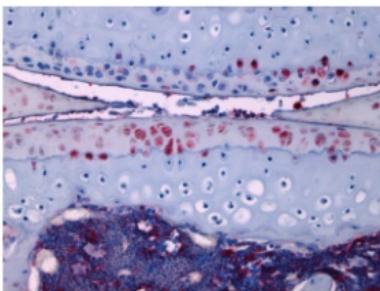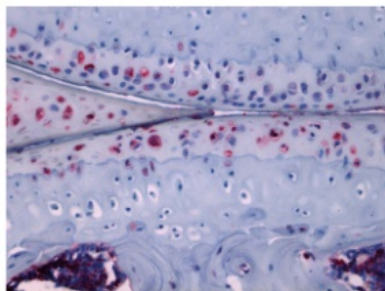

Supplement: MOESM3 [file 9692802]
